# Supplementary material for: Morphological evolution and growth of cerium oxide nanostructures by virtue of organic ligands as well as monomer concentration
Source: Royal Society of Chemistry journal article supplement (doi:10.1039/c5ce00965k), 2015-01-01
Supplement: c5ce00965k1.pdf [file c5ce00965k1.pdf]

## Supplementary Information

### Morphological evolution and growth of cerium oxide nanostructures by virtue of organic ligands as well as monomer concentration.

Asha Krishnan, Thadathil S. Sreeremya, and Swapankumar Ghosh\*

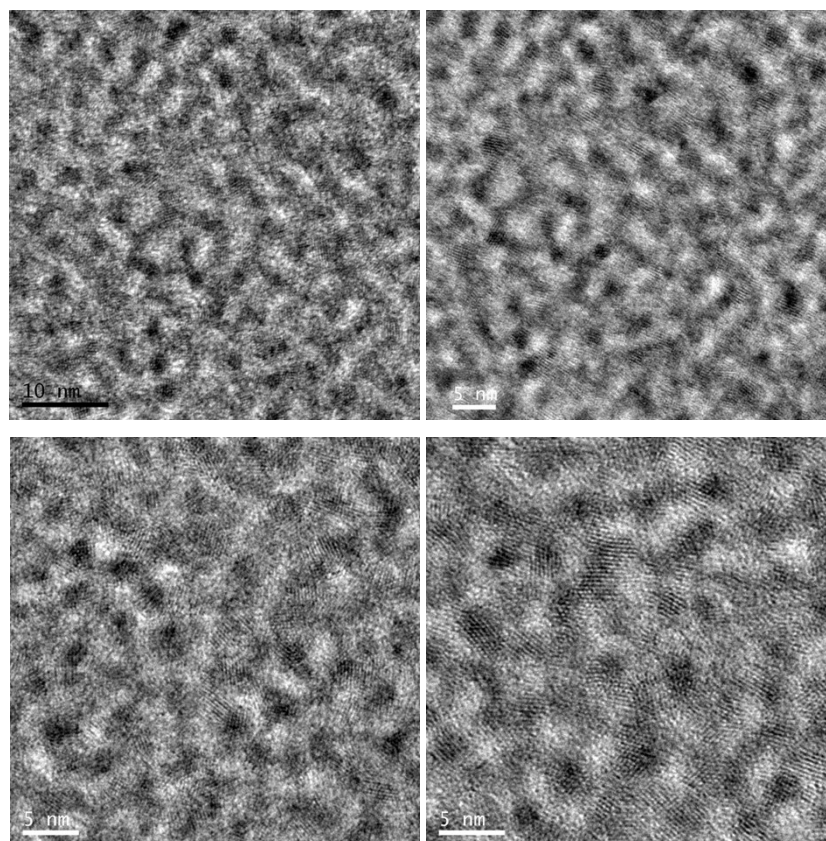

**Fig. S1** Transmission electron microscopy images of OA0.05.

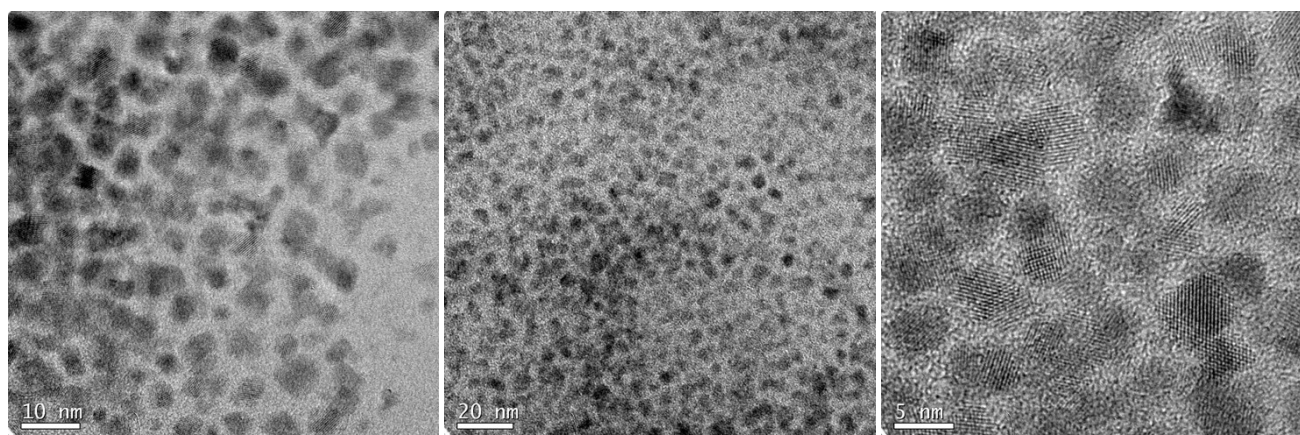

**Fig. S2** Transmission electron microscopy images of SA0.05.

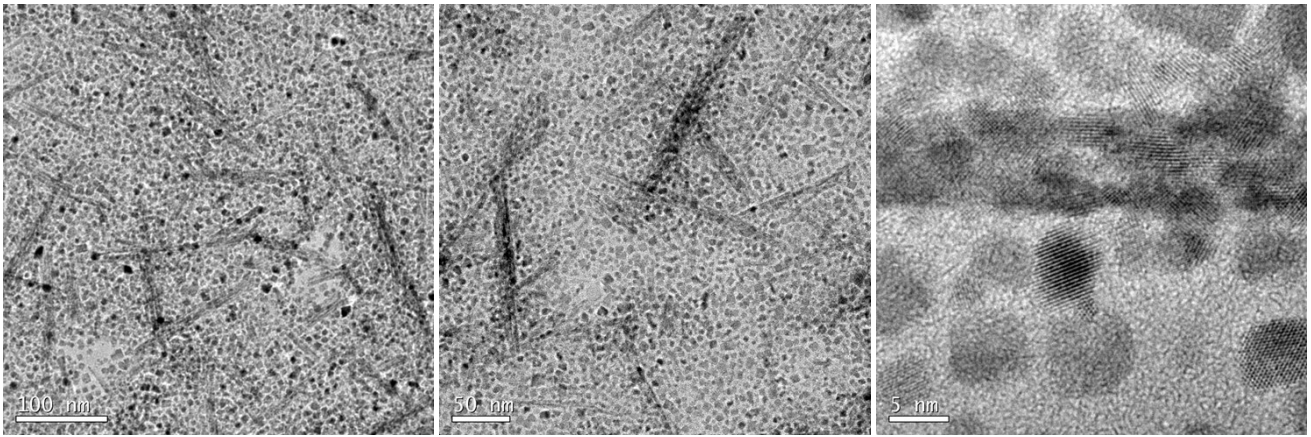

**Fig. S3** Transmission electron microscopy images of 1:6OA0.05.

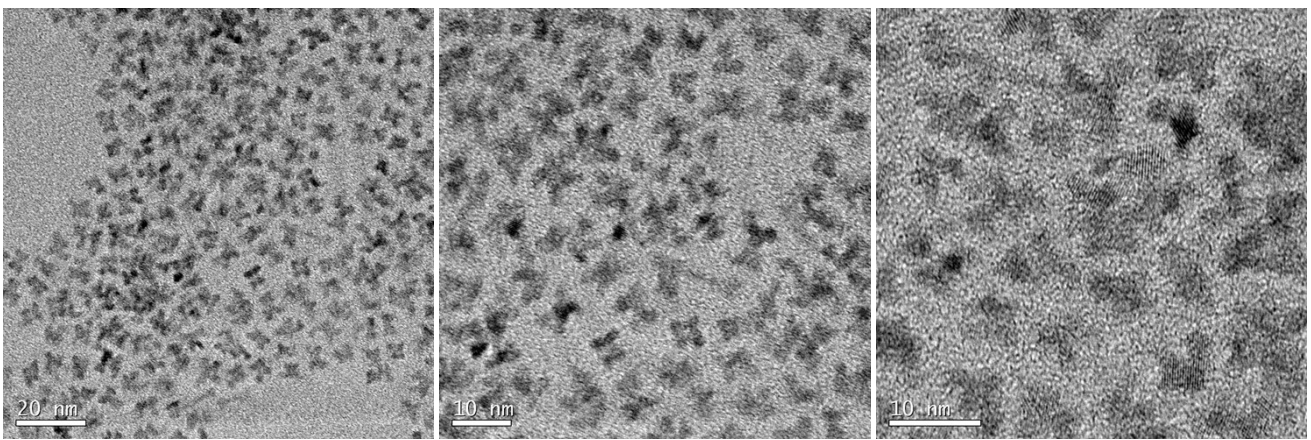

**Fig. S4** Transmission electron microscopy images of OA0.3.

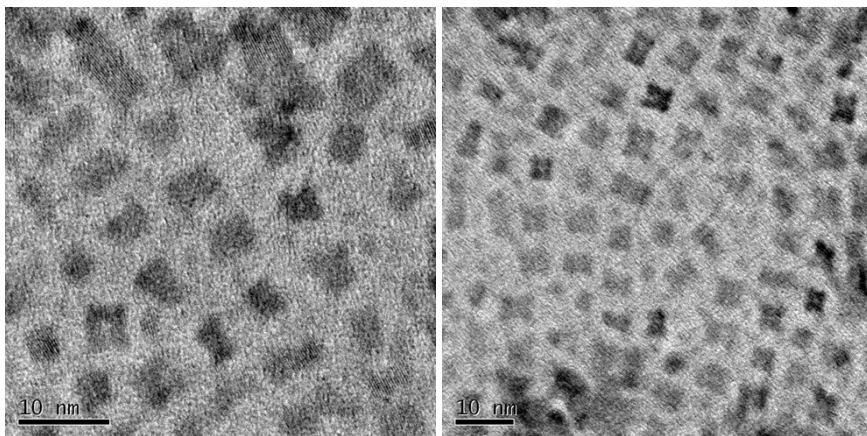

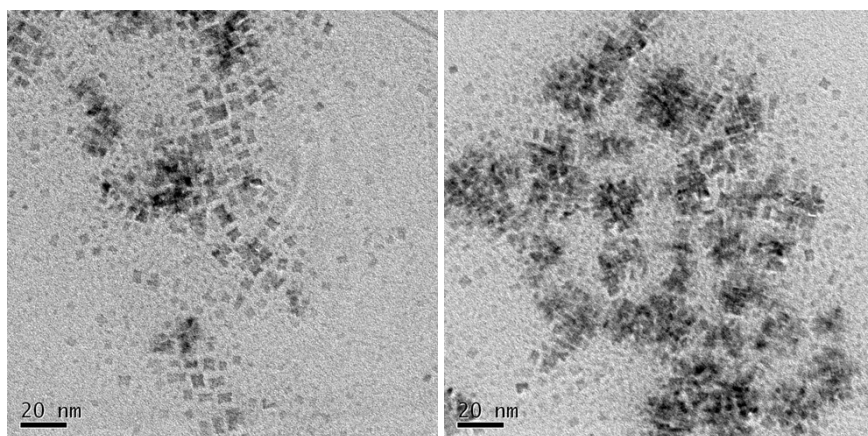

**Fig. S5** Transmission electron microscopy images of OA0.5.

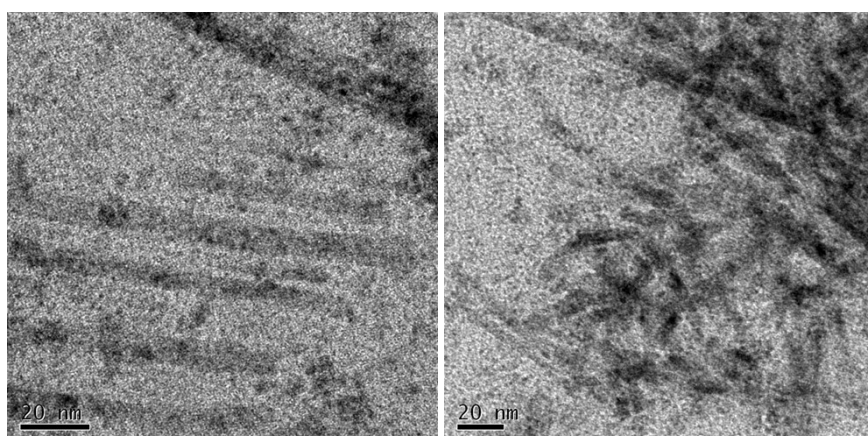

**Fig. S6** Transmission electron microscopy images of OA2.5

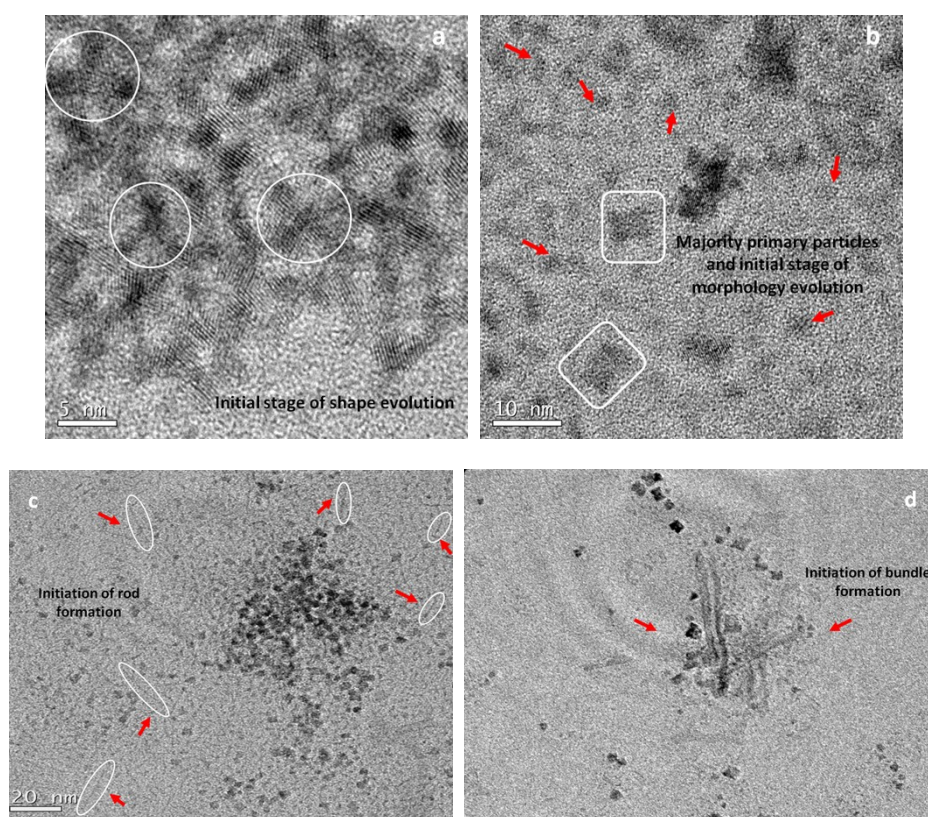

**Fig. S7** Transmission electron microscopy images of samples (a) OA0.3 (b) OA0.5 (c) OA2.5 and (d) OA5 with a reaction time 0.5 h, showing the initial stages of morphological evolution.

**Table S1** Analysis of thermogravimetric patterns for different OA and SA coated CeO<sub>2</sub> samples

|   | Sample    | Peak 1 | Peak 2 | Total loss (%) |
|---|-----------|--------|--------|----------------|
| A | OA5       | 392    |        | 45             |
| B | OA2.5     | 384    |        | 48             |
| C | SA0.05    | 224    | 352    | 50             |
| D | OA0.5     | 384    |        | 52             |
| E | OA0.3     | 146    | 450    | 57.1           |
| F | OA0.05    | 355    | 443    | 61.4           |
| G | 1:6OA0.05 | 372    | 456    | 62             |
